# Supplementary material for: Toxicokinetics of pristine and aged silver nanoparticles in Physa acuta
Source: Royal Society of Chemistry journal article supplement (doi:10.1039/d0en00946f), 2020-01-01
Supplement: d0en00946f1.pdf [file d0en00946f1.pdf]

## Supplementary information

### Toxicokinetics of pristine and aged silver nanoparticles in *Physa acuta*

Patrícia V. Silva<sup>1</sup>, Cornelis A. M. van Gestel<sup>2</sup>, Rudo A. Verweij<sup>2</sup>,  
Anastasios G. Papadiamantis<sup>3,4</sup>, Sandra F. Gonçalves<sup>1</sup>, Iseult  
Lynch<sup>3</sup>, and Susana Loureiro<sup>1</sup>

<sup>1</sup>Department of Biology & CESAM, University of Aveiro, Campus Universitário  
de Santiago, 3810-193 Aveiro, Portugal

<sup>2</sup>Department of Ecological Science, Faculty of Science, Vrije Universiteit  
Amsterdam, The Netherlands

<sup>3</sup> School of Geography, Earth and Environmental Sciences, University of  
Birmingham, Edgbaston, B15 2TT Birmingham, UK

<sup>4</sup>NovaMechanics Ltd., 1065, Nicosia, Cyprus

E-mail contact: [pverissimo@ua.pt](mailto:pverissimo@ua.pt)

7 pages (4 figures, 6 tables)

**Table S1.** Characteristics of the Ag-NPs dispersed in ultrapure water (UPW). Shown are Z-potential values (mV), polydispersity Index (PDI) and mean hydrodynamic diameter (nm) measured by Dynamic Light Scattering (DLS); Dissolved Ag concentration ( $\mu\text{g.L}^{-1}$ ) and percentage of dissolution measured by ICP-MS of 3-8 nm, 50 nm and 60 nm Ag-NPs and Ag<sub>2</sub>S-NPs measured in UPW stock solutions at a nominal concentration of 1 mg Ag.L<sup>-1</sup>. All values are given as mean and standard deviation (mean  $\pm$  SD).

| Nanoparticle         | Timepoint (h) | Z-potential (mV) | DLS (nm)        | PDI             | Dissolved Ag concentration ( $\mu\text{g.L}^{-1}$ ) | % Dissolution    |
|----------------------|---------------|------------------|-----------------|-----------------|-----------------------------------------------------|------------------|
| 3-8 nm Ag-NP         | 0             | 0.03 $\pm$ 0.52  | 144 $\pm$ 19.4  | 0.29 $\pm$ 0.04 | 65 $\pm$ 7.06                                       | 6.50 $\pm$ 0.71  |
|                      | 2             | 0.20 $\pm$ 0.55  | 115 $\pm$ 4.64  | 0.23 $\pm$ 0.04 | 76.6 $\pm$ 5.17                                     | 7.66 $\pm$ 0.52  |
|                      | 4             | -45.7 $\pm$ 2.93 | 121 $\pm$ 3.74  | 0.26 $\pm$ 0.02 | 91.9 $\pm$ 5.04                                     | 9.19 $\pm$ 0.50  |
|                      | 8             | -41 $\pm$ 5.9    | 112 $\pm$ 1.92  | 0.20 $\pm$ 0.03 | 109 $\pm$ 17.8                                      | 10.9 $\pm$ 1.78  |
|                      | 24            | -43.1 $\pm$ 6.33 | 116 $\pm$ 5.79  | 0.21 $\pm$ 0.04 | 187 $\pm$ 25.2                                      | 18.7 $\pm$ 2.52  |
|                      | 48            | -34.1 $\pm$ 12.3 | 125 $\pm$ 20    | 0.17 $\pm$ 0.05 | 210 $\pm$ 40.4                                      | 21.1 $\pm$ 4.04  |
| 50 nm Ag-NP          | 0             | -35.6 $\pm$ 11.2 | 59 $\pm$ 1.19   | 0.22 $\pm$ 0.01 | 52.7 $\pm$ 3.51                                     | 5.27 $\pm$ 0.35  |
|                      | 2             | -54.9 $\pm$ 1.34 | 58.1 $\pm$ 1.48 | 0.23 $\pm$ 0.01 | 86.1 $\pm$ 16.4                                     | 8.61 $\pm$ 1.64  |
|                      | 4             | -42.6 $\pm$ 6.67 | 58.1 $\pm$ 1.75 | 0.23 $\pm$ 0.01 | 108 $\pm$ 31                                        | 10.8 $\pm$ 3.10  |
|                      | 8             | -38.7 $\pm$ 18.1 | 58.7 $\pm$ 1.69 | 0.23 $\pm$ 0.01 | 166 $\pm$ 41.8                                      | 16.6 $\pm$ 4.18  |
|                      | 24            | -32 $\pm$ 19.6   | 56 $\pm$ 1.61   | 0.23 $\pm$ 0.02 | 162 $\pm$ 57.6                                      | 16.2 $\pm$ 5.76  |
|                      | 48            | -25.1 $\pm$ 6.78 | 54.8 $\pm$ 1.34 | 0.23 $\pm$ 0.03 | 261 $\pm$ 60.2                                      | 26.1 $\pm$ 6.02  |
| 60 nm Ag-NP          | 0             | 1.02 $\pm$ 43.3  | n.a.            | n.a.            | n.a.                                                | n.a.             |
|                      | 2             | -20.6 $\pm$ 29.7 | 996 $\pm$ 635   | 0.91            | 1.97 $\pm$ 0.01                                     | 28.2 $\pm$ 0.11  |
|                      | 4             | -6.11 $\pm$ 53.7 | 1265 $\pm$ 673  | 1               | 2.05 $\pm$ 0.03                                     | 29.2 $\pm$ 0.33  |
|                      | 8             | n.a.             | n.a.            | n.a.            | n.a.                                                | n.a.             |
|                      | 24            | -3.86 $\pm$ 38.5 | 1406 $\pm$ 778  | 0.83            | 1.90 $\pm$ 0.08                                     | 27.2 $\pm$ 0.94  |
|                      | 48            | -24.8 $\pm$ 21.6 | 1800 $\pm$ 1497 | 0.93            | 2.05 $\pm$ 0.06                                     | 29.3 $\pm$ 0.73  |
| Ag <sub>2</sub> S-NP | 0             | -33.9 $\pm$ 0.74 | 215 $\pm$ 9.76  | 0.34            | n.a.                                                | n.a.             |
|                      | 2             | -33.1 $\pm$ 14   | 206 $\pm$ 22.3  | 0.41            | 0.13 $\pm$ 0.05                                     | 0.04 $\pm$ 0.02  |
|                      | 4             | -36.2 $\pm$ 5.64 | 206 $\pm$ 23.1  | 0.38            | 0.03 $\pm$ 0.01                                     | 0.01 $\pm$ 0.002 |
|                      | 8             | n.a.             | n.a.            | n.a.            | n.a.                                                | n.a.             |
|                      | 24            | -44.4 $\pm$ 3.36 | 207 $\pm$ 32.9  | 0.4             | 0.02 $\pm$ 0.005                                    | 0.01 $\pm$ 0.001 |
|                      | 48            | -42.1 $\pm$ 4.37 | 212 $\pm$ 18.2  | 0.37            | 0.05 $\pm$ 0.01                                     | 0.01 $\pm$ 0.003 |

n.a. not analysed at that time point.

**Table S2.** Characteristics of the Ag-NPs dispersed in APW medium. Shown are Z-potential values (mV), PDI and mean hydrodynamic diameter (nm) measured by DLS; Dissolved Ag concentration ( $\mu\text{g.L}^{-1}$ ) and percentage of dissolution measured by ICP-MS of 3-8 nm, 50 nm and 60 nm Ag-NPs and  $\text{Ag}_2\text{S}$ -NPs measured in APW medium at a nominal concentration of  $1 \text{ mg Ag.L}^{-1}$ . All values are given as mean and standard deviation (mean  $\pm$  SD).

| Nanoparticle              | Timepoint (h) | Z-potential (mV) | DLS             | PDI             | Dissolved Ag concentration ( $\mu\text{g.L}^{-1}$ ) | % Dissolution      |
|---------------------------|---------------|------------------|-----------------|-----------------|-----------------------------------------------------|--------------------|
| 3-8 nm Ag-NP              | 0             | -25.4 $\pm$ 2.41 | 131 $\pm$ 8.77  | 0.30 $\pm$ 0.04 | 80 $\pm$ 0.28                                       | 8 $\pm$ 0.03       |
|                           | 2             | -0.14 $\pm$ 0.27 | 137 $\pm$ 2.57  | 0.20 $\pm$ 0.02 | 121 $\pm$ 15.1                                      | 12.1 $\pm$ 1.51    |
|                           | 4             | -23.6 $\pm$ 0.99 | 153 $\pm$ 5.33  | 0.22 $\pm$ 0.01 | 123 $\pm$ 11.1                                      | 12.3 $\pm$ 1.11    |
|                           | 8             | -21.7 $\pm$ 0.76 | 162 $\pm$ 2.77  | 0.23 $\pm$ 0.01 | 136 $\pm$ 8.20                                      | 13.6 $\pm$ 0.82    |
|                           | 24            | -24.4 $\pm$ 1.12 | 242 $\pm$ 10.5  | 0.36 $\pm$ 0.03 | 209 $\pm$ 15.2                                      | 20.9 $\pm$ 1.52    |
|                           | 48            | -22.3 $\pm$ 2.02 | 270 $\pm$ 5.61  | 0.40 $\pm$ 0.03 | 209 $\pm$ 15.2                                      | 20.9 $\pm$ 1.52    |
| 50 nm Ag-NP               | 0             | -15.8 $\pm$ 0.79 | 75.6 $\pm$ 1.52 | 0.27 $\pm$ 0.01 | 78.9 $\pm$ 14                                       | 7.89 $\pm$ 1.40    |
|                           | 2             | -6.07 $\pm$ 8.81 | 187 $\pm$ 9.09  | 0.31 $\pm$ 0.03 | 68.9 $\pm$ 24.2                                     | 6.89 $\pm$ 2.42    |
|                           | 4             | -18.2 $\pm$ 1.07 | 236 $\pm$ 5.29  | 0.36 $\pm$ 0.05 | 71.8 $\pm$ 27.7                                     | 7.18 $\pm$ 2.76    |
|                           | 8             | -18.4 $\pm$ 0.63 | 254 $\pm$ 8.36  | 0.42 $\pm$ 0.02 | 83.9 $\pm$ 31.4                                     | 8.39 $\pm$ 3.14    |
|                           | 24            | -19.8 $\pm$ 0.89 | 1133 $\pm$ 168  | 0.1 $\pm$ 0.01  | 107 $\pm$ 34.5                                      | 10.7 $\pm$ 3.45    |
|                           | 48            | -19.7 $\pm$ 1.27 | 1840 $\pm$ 503  | 1 $\pm$ 0       | 140 $\pm$ 21.5                                      | 14 $\pm$ 2.15      |
| 60 nm Ag-NP               | 0             | -20.7 $\pm$ 4.2  | 79.22           | 0.31            | n.a.                                                | n.a.               |
|                           | 2             | -16 $\pm$ 2.59   | 154 $\pm$ 34.7  | 0.30            | 0.16 $\pm$ 0.04                                     | 2.3 $\pm$ 0.60     |
|                           | 4             | -18.4 $\pm$ 3.71 | 174 $\pm$ 48    | 0.32            | 0.12 $\pm$ 0.01                                     | 1.65 $\pm$ 0.08    |
|                           | 8             | n.a.             | n.a.            | n.a.            | n.a.                                                | n.a.               |
|                           | 24            | -22.4 $\pm$ 2.15 | 132 $\pm$ 14    | 0.24            | 0.08 $\pm$ 0.01                                     | 1.12 $\pm$ 0.18    |
|                           | 48            | -24.8 $\pm$ 1.44 | 134 $\pm$ 9.41  | 0.24            | 0.06 $\pm$ 0.003                                    | 0.82 $\pm$ 0.05    |
| $\text{Ag}_2\text{S}$ -NP | 0             | -9.55 $\pm$ 0.66 | 191 $\pm$ 6.55  | 0.33            | n.a.                                                | n.a.               |
|                           | 2             | -9.31 $\pm$ 2.51 | 213 $\pm$ 30.6  | 0.4             | 0.71 $\pm$ 0.06                                     | 0.20 $\pm$ 0.02    |
|                           | 4             | -8.93 $\pm$ 0.49 | 206 $\pm$ 16.8  | 0.41            | 0.15 $\pm$ 0.16                                     | 0.04 $\pm$ 0.05    |
|                           | 8             | n.a.             | n.a.            | n.a.            | n.a.                                                | n.a.               |
|                           | 24            | -8.35 $\pm$ 2.18 | 183 $\pm$ 20.6  | 0.37            | 0.12 $\pm$ 0.17                                     | 0.03 $\pm$ 0.05    |
|                           | 48            | -7.97 $\pm$ 3.68 | 159 $\pm$ 13.5  | 0.35            | 0.01 $\pm$ 0.002                                    | 0.002 $\pm$ 0.0005 |

n.a. not analysed at that time point.

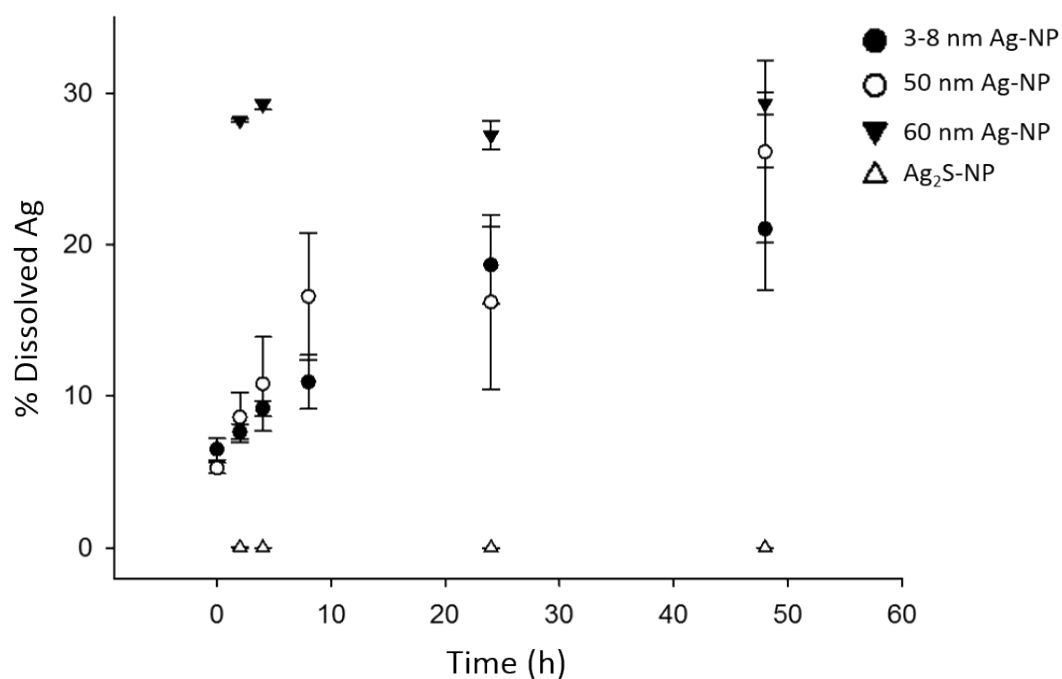

**Figure S1.** Percentage of dissolved Ag at 0, 2, 4, 8, 24 and 48 hours from 3-8 nm and 50 nm Ag-NPs and at 2, 4, 24 and 48 hours from 60 nm Ag-NPs and Ag<sub>2</sub>S-NPs, measured by ICP-MS in ultrapure water (UPW) stock solutions of 1 mg Ag.L<sup>-1</sup>. Error bars indicate the standard deviation.

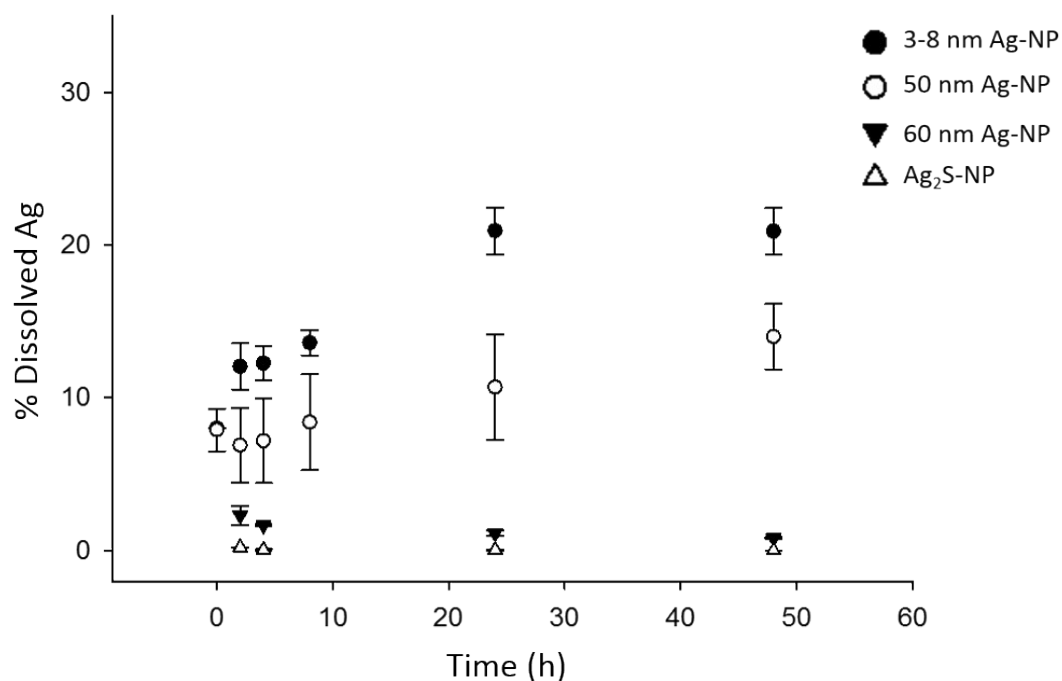

**Figure S2.** Percentage of dissolved Ag at 0, 2, 4, 8, 24 and 48 hours from 3-8 nm and 50 nm Ag-NPs and at 2, 4, 24 and 48 hours from 60 nm Ag-NPs and Ag<sub>2</sub>S-NPs, measured by ICP-MS in APW medium solutions at a nominal concentration of 1 mg Ag.L<sup>-1</sup>. Error bars indicate the standard deviation.

**Table S3.** Total Ag concentrations determined at day 0 and dissolved Ag concentrations ( $\mu\text{g Ag.L}^{-1}$ ) determined at days 0, 1 and 2 in water samples of all exposures of the Ag-spiked water test. Values are given as mean and standard deviation (mean  $\pm$  SD;  $n=3$ ). Different capital letters in bold within a column and different small letters in italics within a line indicate statistically significant differences (one-way ANOVA followed by Holm-Sidak Method ( $p<0.05$ )).

| Ag form               | Total Ag concentrations<br>( $\mu\text{g Ag.L}^{-1}$ ) | Dissolved Ag concentrations<br>( $\mu\text{g Ag.L}^{-1}$ ) |                                     |                                     |
|-----------------------|--------------------------------------------------------|------------------------------------------------------------|-------------------------------------|-------------------------------------|
|                       | Day 0                                                  | Day 0                                                      | Day 1                               | Day 2                               |
| 3-8 nm Ag-NP          | 11.1 $\pm$ 0.62 <b>A</b>                               | 0.12 $\pm$ 0.04 <b>A</b> / <i>a</i>                        | 0.26 $\pm$ 0.14 <b>A</b> / <i>a</i> | 0.25 $\pm$ 0.14 <b>A</b> / <i>a</i> |
| 50 nm Ag-NP           | 8.28 $\pm$ 0.30 <b>B</b>                               | 0.03 $\pm$ 0.02 <b>A</b> / <i>a</i>                        | 0.27 $\pm$ 0.16 <b>A</b> / <i>a</i> | 0.32 $\pm$ 0.29 <b>A</b> / <i>a</i> |
| 60 nm Ag-NP           | 10.3 $\pm$ 0.42 <b>A</b>                               | 3.25 $\pm$ 0.48 <b>B</b> / <i>a</i>                        | 3.57 $\pm$ 0.62 <b>B</b> / <i>a</i> | 3.64 $\pm$ 0.06 <b>B</b> / <i>a</i> |
| Ag <sub>2</sub> S-NPs | 16.8 $\pm$ 0.72 <b>C</b>                               | 0.08 $\pm$ 0.1 <b>A</b> / <i>a</i>                         | 0.17 $\pm$ 0.09 <b>A</b> / <i>a</i> | 0.05 $\pm$ 0.08 <b>A</b> / <i>a</i> |
| AgNO <sub>3</sub>     | 7.51 $\pm$ 0.26 <b>B</b>                               | 2.35 $\pm$ 0.2 <b>B</b> / <i>a</i>                         | 2.49 $\pm$ 0.16 <b>C</b> / <i>a</i> | 2.99 $\pm$ 0.12 <b>C</b> / <i>b</i> |

**Table S4.** Measured concentrations given as mean and standard deviation (mean  $\pm$  SD;  $n=3$ ) in water spiked at a nominal concentration of 10  $\mu\text{g Ag.L}^{-1}$  and non-spiked sediment at days 0, 3 and 7 of the uptake phase of all exposures of the Ag-spiked water and clean sediment test. Measured concentrations in water are expressed in  $\mu\text{g Ag.L}^{-1}$  and in the sediment are in  $\mu\text{g Ag.kg}^{-1}$ .  $k_{d_{\text{water}}}$  and  $k_{i_{\text{sed}}}$  ( $\text{day}^{-1}$ ) are the Ag concentration decrease rate constant in water and Ag concentration increase rate constant in sediment, respectively. Different capital letters in bold within a column and different small letters in italics within a line indicate statistically significant differences (one-way ANOVA followed by Holm-Sidak Method ( $p<0.05$ )).

| Exposure route  | Ag form               | Measured concentration at day 0<br>( $\mu\text{g Ag.L}^{-1}$ and $\mu\text{g Ag.kg}^{-1}$ )* | Measured concentration at day 3<br>( $\mu\text{g Ag.L}^{-1}$ and $\mu\text{g Ag.kg}^{-1}$ ) | Measured concentration at day 7<br>( $\mu\text{g Ag.L}^{-1}$ and $\mu\text{g Ag.kg}^{-1}$ ) | $k_{d_{\text{water}}}$ or $k_{i_{\text{sed}}}$ ( $\text{day}^{-1}$ ) |
|-----------------|-----------------------|----------------------------------------------------------------------------------------------|---------------------------------------------------------------------------------------------|---------------------------------------------------------------------------------------------|----------------------------------------------------------------------|
| <b>Water</b>    | 3-8 nm                | 10 $\pm$ 0.08 <b>A</b> / <i>a</i>                                                            | 3.31 $\pm$ 1.46 <b>A</b> / <i>b</i>                                                         | 2.47 $\pm$ 0.04 <b>A</b> / <i>b</i>                                                         | -0.29                                                                |
|                 | 50 nm                 | 8.82 $\pm$ 0.43 <b>A</b> / <i>a</i>                                                          | 3.17 $\pm$ 1.01 <b>A</b> / <i>b</i>                                                         | 0.35 $\pm$ 0.26 <b>A</b> / <i>c</i>                                                         | -0.36                                                                |
|                 | 60 nm                 | 9.43 $\pm$ 0.23 <b>A</b> / <i>a</i>                                                          | 1.91 $\pm$ 0.39** <b>A</b> / <i>b</i>                                                       | 0.9 $\pm$ 1.25 <b>A</b> / <i>b</i>                                                          | -0.49                                                                |
|                 | Ag <sub>2</sub> S-NPs | 12.2 $\pm$ 0.74 <b>B</b> / <i>a</i>                                                          | 3.58 $\pm$ 1.66 <b>A</b> / <i>b</i>                                                         | 0.75 $\pm$ 0.39 <b>A</b> / <i>c</i>                                                         | -0.41                                                                |
|                 | AgNO <sub>3</sub>     | 8.84 $\pm$ 0.58 <b>A</b> / <i>a</i>                                                          | 1.42 $\pm$ 0.16 <b>A</b> / <i>b</i>                                                         | 0.31 $\pm$ 0.13 <b>A</b> / <i>c</i>                                                         | -0.60                                                                |
| <b>Sediment</b> | 3-8 nm                | 10.1 $\pm$ 2.95 <i>a</i>                                                                     | 15.3 $\pm$ 2.32 <b>A</b> / <i>a</i>                                                         | 16.9 $\pm$ 4.08 <b>A</b> / <i>a</i>                                                         | 0.08                                                                 |
|                 | 50 nm                 | 10.1 $\pm$ 2.95 <i>a</i>                                                                     | 12.8 $\pm$ 1.38 <b>A</b> / <i>a</i>                                                         | 18.3 $\pm$ 1.40 <b>A, B</b> / <i>b</i>                                                      | 0.09                                                                 |
|                 | 60 nm                 | 10.1 $\pm$ 2.95 <i>a</i>                                                                     | 22.2 $\pm$ 5.17 <b>A</b> / <i>b</i>                                                         | 25.6 $\pm$ 4.40 <b>B</b> / <i>b</i>                                                         | 0.14                                                                 |
|                 | Ag <sub>2</sub> S-NPs | 10.1 $\pm$ 2.95 <i>a</i>                                                                     | 24.3 $\pm$ 2.93 <b>A</b> / <i>b</i>                                                         | 20.8 $\pm$ 1.02 <b>A, B</b> / <i>b</i>                                                      | 0.12                                                                 |
|                 | AgNO <sub>3</sub>     | 10.1 $\pm$ 2.95 <i>a</i>                                                                     | 32.8 $\pm$ 20.7 <b>A</b> / <i>a</i>                                                         | 18.5 $\pm$ 1.92 <b>A, B</b> / <i>a</i>                                                      | 0.12                                                                 |

\* background concentration in sediments, therefore, was considered the same concentration at day 0 for sediments of all treatments.

\*\*  $n=2$

**Table S5.** Total Ag concentrations determined at day 0 and dissolved Ag concentrations ( $\mu\text{g Ag.L}^{-1}$ ) determined at days 0, 1, 2 and 7 in water samples of all exposures of the Ag-spiked water and clean sediment test. Values are given as mean and standard deviation (mean  $\pm$  SD;  $n=3$ ). Different capital letters in bold within a column and different small letters in italics within a line indicate statistically significant differences (one-way ANOVA followed by Holm-Sidak Method ( $p<0.05$ )).

| Ag form               | Total Ag concentrations<br>( $\mu\text{g Ag.L}^{-1}$ ) | Dissolved Ag concentrations<br>( $\mu\text{g Ag.L}^{-1}$ ) |                                     |                                        |                                     |
|-----------------------|--------------------------------------------------------|------------------------------------------------------------|-------------------------------------|----------------------------------------|-------------------------------------|
|                       | Day 0                                                  | Day 0                                                      | Day 1                               | Day 2                                  | Day 7                               |
| 3-8 nm                | 11.9 $\pm$ 0.31** <b>A, B</b>                          | 0 $\pm$ 0 <b>A</b> / <i>a</i>                              | 0.15 $\pm$ 0.11 <b>A</b> / <i>a</i> | 0.14 $\pm$ 0.07 <b>A</b> / <i>a</i>    | 0.05 $\pm$ 0.01 <b>A</b> / <i>a</i> |
| 50 nm                 | 11.2 $\pm$ 2.48 <b>A</b>                               | 0 $\pm$ 0 <b>A</b> / <i>a</i>                              | 0.34 $\pm$ 0.33 <b>A</b> / <i>b</i> | 0.38 $\pm$ 0.13 <b>B</b> / <i>b</i>    | 0 $\pm$ 0 <b>A</b> / <i>a</i>       |
| 60 nm                 | 11.1* <b>A</b>                                         | 0.02 $\pm$ 0.02 <b>A</b> / <i>a</i>                        | 1.19 $\pm$ 0.82 <b>A</b> / <i>b</i> | 0.66 $\pm$ 0.11 <b>C</b> / <i>c</i>    | 0 $\pm$ 0 <b>A</b> / <i>a</i>       |
| Ag <sub>2</sub> S-NPs | 16.8 $\pm$ 1.41 <b>B</b>                               | 0 $\pm$ 0 <b>A</b> / <i>a</i>                              | 0.06 $\pm$ 0.03 <b>A</b> / <i>b</i> | 0.07 $\pm$ 0.03 <b>A</b> / <i>b</i>    | 0 $\pm$ 0 <b>A</b> / <i>a</i>       |
| AgNO <sub>3</sub>     | 9.35 $\pm$ 0.13** <b>A</b>                             | 0 $\pm$ 0 <b>A</b> / <i>a</i>                              | 0.79 $\pm$ 0.61 <b>A</b> / <i>b</i> | 0.54 $\pm$ 0.03 <b>B, C</b> / <i>c</i> | 0.01 $\pm$ 0.01 <b>A</b> / <i>a</i> |

\* denotes a single measurement and \*\* denotes two measurements.

**Table S6.** Measured concentrations (mg Ag.kg<sup>-1</sup>) given as mean and standard deviation (mean ± SD, *n*=3) in sediment spiked at a nominal concentration of 10 mg Ag.kg<sup>-1</sup> at days 0, 3 and 7 of the uptake phase of all exposures of the Ag-spiked sediment test. Different capital letters in bold within a column and different small letters in italics within a line indicate statistically significant differences (one-way ANOVA followed by Holm-Sidak Method (*p*<0.05)).

|                 | Ag form               | Measured concentration at day 0 (mg Ag.kg <sup>-1</sup> ) | Measured concentration at day 3 (mg Ag.kg <sup>-1</sup> ) | Measured concentration at day 7 (mg Ag.kg <sup>-1</sup> ) |
|-----------------|-----------------------|-----------------------------------------------------------|-----------------------------------------------------------|-----------------------------------------------------------|
| <b>Sediment</b> | 3-8 nm                | 12.2±1.07 <b>A</b> / <i>a</i>                             | 8.30±0.13 <b>A, B</b> / <i>b</i>                          | 8.99±0.43 <b>A, B</b> / <i>b</i>                          |
|                 | 50 nm                 | 8.13±1.25 <b>B</b> / <i>a</i>                             | 7.20±0.20 <b>A</b> / <i>a</i>                             | 8.65±0.57 <b>A</b> / <i>a</i>                             |
|                 | 60 nm                 | 9.55±0.82 <b>A, B</b> / <i>a</i>                          | 9.42±0.92 <b>B</b> / <i>a</i>                             | 11.7±2.04 <b>B</b> / <i>a</i>                             |
|                 | Ag <sub>2</sub> S-NPs | 9.89±0.21 <b>A, B</b> / <i>a, b</i>                       | 9.52±0.54 <b>B</b> / <i>a</i>                             | 11±0.72 <b>A, B</b> / <i>b</i>                            |
|                 | AgNO <sub>3</sub>     | 8.26±1.05 <b>B</b> / <i>a</i>                             | 8.51±0.67 <b>A, B</b> / <i>a</i>                          | 8.97±0.23 <b>A, B</b> / <i>a</i>                          |

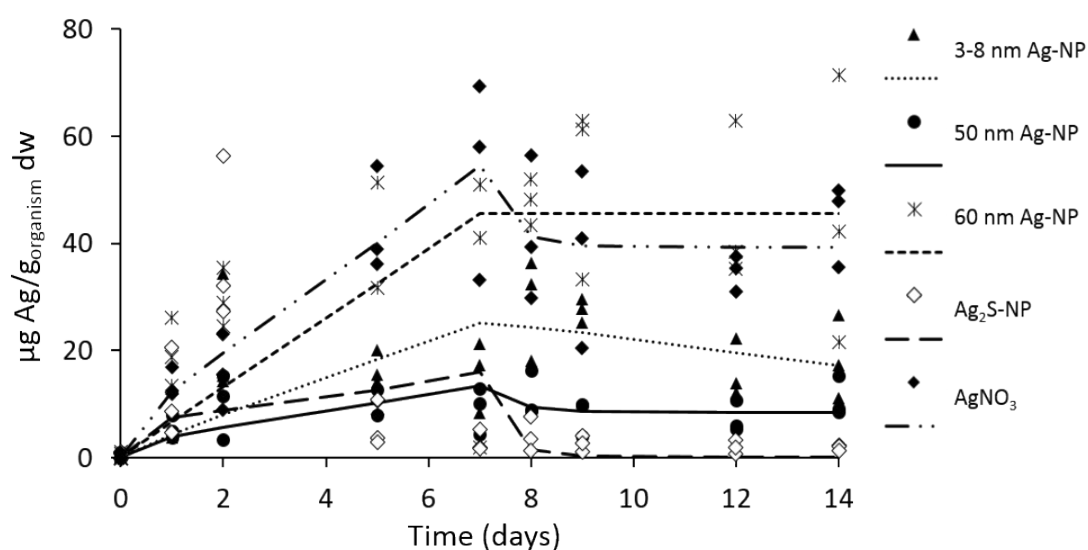

**Figure S3.** Uptake and elimination kinetics of 3-8 nm, 50 nm and 60 nm Ag-NPs, Ag<sub>2</sub>S-NPs and AgNO<sub>3</sub> in the freshwater snail *Physa acuta* exposed for 7 days to water spiked at a nominal concentration of 10 µg Ag.L<sup>-1</sup> and then transferred to clean water for 7 days, in the Ag-spiked water and clean sediment test. Lines represent the fit of a one-compartment model to the data, which represent Ag concentrations measured in individual snail soft bodies. **Data was modelled considering the sediment as the single exposure route.**

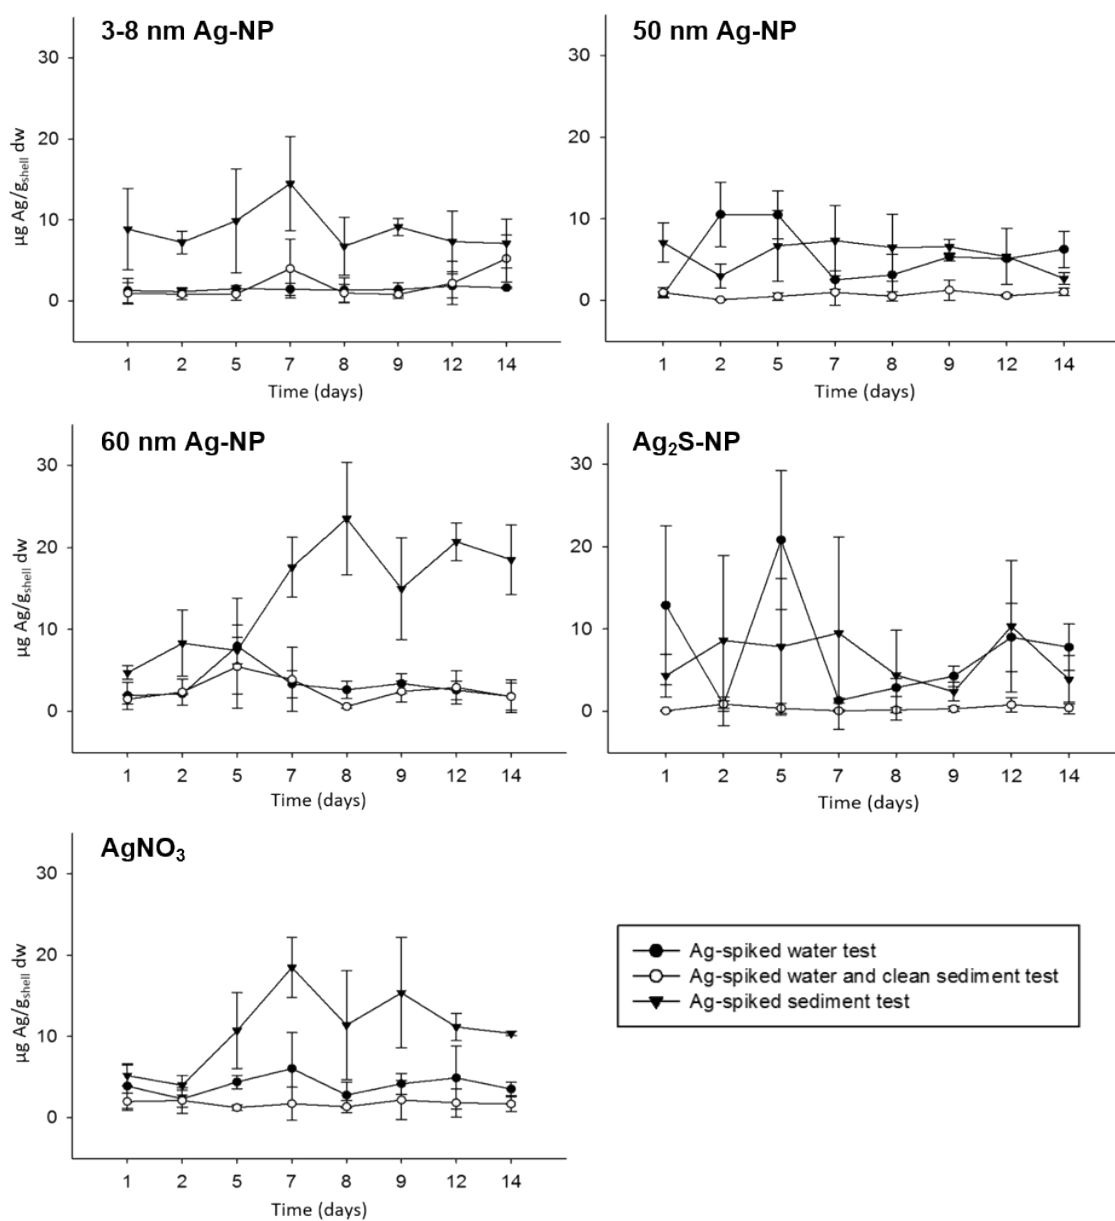

**Figure S4.** Silver concentrations ( $\mu\text{g Ag}\cdot\text{g}^{-1}\text{ dw}$ ) given as mean and standard deviation (mean  $\pm$  SD,  $n=3$ ) measured in the shell of *Physa acuta* exposed to 3-8 nm, 50 nm and 60 nm Ag-NPs, Ag<sub>2</sub>S-NPs and AgNO<sub>3</sub> during the uptake and elimination phases of the Ag-spiked water test, Ag-spiked water and clean sediment test and Ag-spiked sediment test. Error bars indicate standard deviation.
